# 1            **Hydraulic diversity stabilizes productivity in a large-scale** 2            **subtropical tree biodiversity experiment**

3    *Florian Schnabel*<sup>1,2,†,\*</sup>, *Xiaojuan Liu*<sup>3,†,\*</sup>, *Matthias Kunz*<sup>4,\*</sup>, *Kathryn E. Barry*<sup>1,2</sup>, *Franca J. Bongers*<sup>3</sup>,  
4    *Helge Bruelheide*<sup>1,5</sup>, *Andreas Fichtner*<sup>6</sup>, *Werner Härdtle*<sup>6</sup>, *Shan Li*<sup>3</sup>, *Claas-Thido Pfaff*<sup>1,2</sup>, *Bernhard*  
5    *Schmid*<sup>7</sup>, *Julia A. Schwarz*<sup>8</sup>, *Zhiyao Tang*<sup>9</sup>, *Bo Yang*<sup>10</sup>, *Jürgen Bauhus*<sup>8</sup>, *Goddert von Oheimb*<sup>1,4</sup>, *Keping*  
6    *Ma*<sup>3</sup>, *Christian Wirth*<sup>1,2</sup>

7    † Equal contribution; \* Corresponding authors: [florian.schnabel@idiv.de](mailto:florian.schnabel@idiv.de), [liuxiaojuan06@ibcas.ac.cn](mailto:liuxiaojuan06@ibcas.ac.cn),  
8    [matthias.kunz@tu-dresden.de](mailto:matthias.kunz@tu-dresden.de)

## 9            **Affiliations**

11    <sup>1</sup> German Centre for Integrative Biodiversity Research (iDiv) Halle-Jena-Leipzig, Leipzig, Germany

12    <sup>2</sup> Systematic Botany and Functional Biodiversity, Leipzig University, Leipzig, Germany

13    <sup>3</sup> State Key Laboratory of Vegetation and Environmental Change, Institute of Botany, Chinese Academy of  
14    Sciences, Beijing, China

15    <sup>4</sup> Institute of General Ecology and Environmental Protection, Technische Universität Dresden, Tharandt,  
16    Germany

17    <sup>5</sup> Institute of Biology/Geobotany and Botanical Garden, Martin Luther University Halle-Wittenberg, Halle  
18    (Saale), Germany

19    <sup>6</sup> Leuphana University of Lüneburg, Institute of Ecology, Lüneburg, Germany

20    <sup>7</sup> Department of Geography, University of Zurich, Zurich, Switzerland

21    <sup>8</sup> Chair of Silviculture, Institute of Forest Sciences, Freiburg University, Freiburg, Germany

22    <sup>9</sup> Institute of Ecology, College of Urban and Environmental Sciences, and Key Laboratory for Earth Surface  
23    Processes of the Ministry of Education, Peking University, Beijing, China

24    <sup>10</sup> Institute of Biology, Geobotany and Botanical Garden, Jingdezhen University, Jiangxi, China

## 25            **ORCID IDs**

27    F.S. (0000-0001-8452-4001); X.L.(0000-0002-9292-4432), M.K. (0000-0002-0541-3424); K.E.B. (0000-  
28    0001-6893-6479); F.J.B. (0000-0001-9517-4932); H.B. (0000-0003-3135-0356); A.F. (0000-0003-0499-  
29    4893); W.H. (0000-0002-5599-5792); B.S. (0000-0002-8430-3214); J.A.S. (0000-0003-2610-3588); J.B.  
30    (0000-0002-9673-4986); G.v.O. (0000-0001-7408-425X); K.M. (0000-0001-9112-5340); C.W. (0000-  
31    0003-2604-8056)

32  
33  
34

## 35 **Abstract**

36 Extreme climatic events threaten forests and their climate mitigation potential globally.  
37 Understanding the drivers promoting ecosystems stability is therefore considered crucial to  
38 mitigate adverse climate change effects on forests. Here, we use structural equation models to  
39 explain how tree species richness, asynchronous species dynamics and diversity in hydraulic traits  
40 affect the stability of forest productivity along an experimentally manipulated biodiversity gradient  
41 ranging from 1 to 24 tree species. Tree species richness improved stability by increasing species  
42 asynchrony. That is at higher species richness, inter-annual variation in productivity among tree  
43 species buffered the community against stress-related productivity declines. This effect was  
44 mediated by the diversity of species' hydraulic traits in relation to drought tolerance and stomatal  
45 control, but not the community-weighted means of these traits. Our results demonstrate important  
46 mechanisms by which tree species richness stabilizes forest productivity, thus emphasizing the  
47 importance of hydraulically diverse, mixed-species forests to adapt to climate change.

48

## 49 **Introduction**

50 Climate change is increasing the frequency and severity of droughts and other extreme events,  
51 threatening tree growth and survival globally<sup>1</sup>. This compromises the ability of the world's forests  
52 to act as a carbon sink<sup>2</sup> and as a nature-based solution to climate change<sup>3</sup>. Stability, the ability of  
53 forests to maintain functioning in periods of stress, is consequently emerging as a primary focus  
54 of forest management in the 21st century. One key management strategy to enhance stability may  
55 be to increase tree species richness in secondary and plantation forests<sup>4-6</sup>. However, we lack a  
56 comprehensive understanding of what drives biodiversity-stability relationships in forest  
57 ecosystems.

58

59 There is compelling evidence that species richness can stabilize community biomass production  
60 against variable climate conditions such as droughts or extremely wet years<sup>7–10</sup>. However, the  
61 majority of this evidence comes from grassland ecosystems. Biodiversity-stability relationships  
62 likely differ between forests and grasslands because trees invest into long-lasting structures and  
63 community composition changes slower in forests<sup>6</sup>. The few existing studies in forests support the  
64 notion that species richness stabilizes aboveground wood production, hereafter referred to as  
65 ‘productivity’, of mixed-species tree communities<sup>6,11,12</sup>. However, previous studies were largely  
66 restricted to temperate and boreal forests and tree diversity gradients have been short so that  
67 establishing causal relationships between tree diversity and the stability of productivity remains  
68 difficult<sup>13</sup>.

69

70 According to the insurance hypothesis<sup>14,15</sup> a mixture of tree species with different strategies should  
71 help to maintain or increase the functioning of forests under highly variable climatic conditions,  
72 thus increasing their temporal stability. This stability<sup>16</sup> has often been defined as temporal mean  
73 productivity ( $\mu$ ) divided by the temporal standard deviation in productivity ( $\sigma$ )<sup>e.g.7,8</sup> and may be  
74 promoted by diversity in mixed-species tree communities via two principal mechanisms<sup>14</sup>. First,  
75 overyielding, which refers to an increased temporal mean productivity in mixtures compared to  
76 monocultures, has been reported by numerous studies in natural and experimental forests<sup>17–20</sup>.  
77 Here, different species perform relatively better in mixtures than in monocultures, for example  
78 through complementary resource use or facilitation and this higher performance can increase  
79 stability<sup>6</sup>. Second, decreased temporal variation in community productivity through buffering of  
80 the effects of stress may increase stability. In contrast to overyielding, little is known about this

81 buffering effect of biodiversity in forest ecosystems. Various mechanisms may decrease temporal  
82 variation in productivity<sup>14,16,21,22</sup> but arguably the one most supported by theoretical and  
83 observational studies in grasslands and increasingly also in forests is species asynchrony<sup>7,21,23</sup>. In  
84 forests, these asynchronous inter-annual dynamics in productivity among tree species (hereafter  
85 ‘species asynchrony’<sup>22</sup>) have been found to be the strongest driver of community stability in  
86 some<sup>6,24,25</sup> but not all studies<sup>11</sup>. Asynchronous species dynamics may result from intrinsic rhythms  
87 like phenology or mast seeding<sup>26,27</sup>, extrinsic factors such as climatic conditions<sup>22,28</sup> and species  
88 interactions in mixtures like resource partitioning or biotic feedbacks<sup>29,30</sup>. Species asynchrony may  
89 buffer the temporal variation in community productivity during times of stress as some species  
90 likely maintain functioning or compensate for the productivity losses of other species (Fig. 1). This  
91 stabilizing effect may be especially important in the context of the global increase in the severity  
92 and frequency of drought events<sup>31,32</sup>. Hence, there is an urgent need to identify the characteristics  
93 that allow tree species and species mixtures to maintain functioning under future drought  
94 conditions.

95  
96 While the number of species may increase stability, communities also require certain hydraulic  
97 characteristics to endure drought. Among other features such as non-structural carbohydrates<sup>33</sup>,  
98 two key hydraulic strategies that determine a tree’s response to drought are drought tolerance and  
99 stomatal control<sup>28</sup>. First, drought tolerance depends on xylem resistance to cavitation because  
100 embolism decreases water availability and may ultimately lead to desiccation and tree death<sup>28,34</sup>.  
101 Here, we use the threshold at which 50% of xylem conductivity is lost due to cavitation ( $\Psi_{50}$ ;  
102 measured as water potential) as key trait<sup>34</sup> and, in addition, classic traits of the leaf economics  
103 (indicating conservative vs acquisitive resource use)<sup>35</sup> to quantify drought tolerance. Second, tree

104 species may follow different strategies of stomatal control. Some rely on continued water  
105 extraction and keep their stomata open, i.e. they continue to transpire even though this poses a high  
106 risk for cavitation-induced mortality under extreme drought (called water-spenders or anisohydric  
107 species)<sup>28,36,37</sup>. Other tree species decrease their stomatal conductance quickly during water  
108 shortage to avoid transpiration losses and xylem cavitation but may risk carbon starvation under  
109 prolonged droughts (called water-savers or isohydric species). Consistent with recent  
110 perspectives<sup>37</sup>, we view stomatal control here along a gradient from water-spending to water-  
111 saving species behaviour and quantify it through physiological traits such as stomata conductance  
112 and control of conductance under increasing water pressure deficits<sup>38,39</sup>.

113

114 These different hydraulic strategies may enable mixed-species forests to stabilize community  
115 productivity in two ways. Diverse hydraulic strategies may stabilize productivity through  
116 promoting species asynchrony. Stability was recently shown to strongly increase with species  
117 asynchrony in experimental tree mixtures<sup>40</sup>, but the underlying trait-based mechanisms remain  
118 unknown in forests. On the other hand, stability may be influenced by the community-weighted  
119 mean of hydraulic traits, as indicated by findings in grassland diversity experiments where stability  
120 was higher in communities dominated by species with traits associated with conservative resource  
121 use<sup>7</sup>. Here, we hypothesize that tree species richness increases stability via increasing species  
122 asynchrony and that diversity in functional traits related to hydraulic water transport (hereafter  
123 ‘hydraulic diversity’<sup>41</sup>) drives these asynchronous species responses. We thus expect trait diversity  
124 to be more important for stability than community trait means.

125

126 We use structural equation models (SEMs) to test the direct and indirect effects of species richness,  
127 species asynchrony, hydraulic diversity and the community-weighted means of hydraulic traits on  
128 the stability of community productivity in a large-scale tree biodiversity experiment (BEF-  
129 China<sup>17,42</sup>; biodiversity–ecosystem functioning China). The experiment is located in the diverse  
130 subtropical forests of China and features a gradient of species richness ranging from monocultures  
131 up to mixtures of 24 tree species planted at two sites with distinct species pools. In our study,  
132 stomatal control and drought tolerance strategies form two orthogonal species trait gradients  
133 (Supplementary Fig. 1), which allows us to quantify their relative contributions to species  
134 asynchrony and stability. Specifically we tested the following hypotheses:

135

136 **H1** Tree species richness increases stability via species asynchrony.

137

138 **H2** Hydraulic diversity in stomata control and drought tolerance strategies increases stability  
139 through increasing species asynchrony.

140

141 **H3** Stability increases through buffered temporal variation in productivity mediated by species  
142 asynchrony and by overyielding.

143

## 144 **Results**

145 Overall, the stability of community productivity significantly increased with species richness in  
146 our experimental tree communities. We found significant positive relationships between stability,  
147 species asynchrony and hydraulic diversity – calculated as functional dispersion of species along  
148 two trait gradients related to stomatal control (functional diversity of stomatal control) and

149 resistance to cavitation (functional diversity of drought tolerance) (Fig. 2; Supplementary Figs. 1-  
150 4; Supplementary Table 1-2). In contrast, community-weighted means (CWMs) of these hydraulic  
151 gradients did not influence the stability of productivity (Supplementary Fig. 5; Supplementary  
152 Table 2). Specifically, we found a significant positive effect of species richness on stability  
153 ( $t=3.98$ ,  $P<0.001$ ,  $n=375$ ; Fig. 2), which was insensitive to the inclusion or exclusion of  
154 monocultures into the models (Supplementary Fig. 6; Supplementary Table 2). Among the  
155 analysed bivariate relationships species asynchrony had, as predicted, the strongest positive effect  
156 on stability in mixtures and explained most of its variation ( $t=10.13$ ,  $P<0.001$ , marginal  $R^2=34\%$ ,  
157  $n=218$ ; Fig. 2; Supplementary Table 2). Species asynchrony significantly increased with species  
158 richness ( $t=9.53$ ,  $P<0.001$ ), functional diversity of stomatal control ( $t=5.29$ ,  $P<0.001$ ) and  
159 functional diversity of drought tolerance ( $t=5.84$ ,  $P<0.001$ ) (Supplementary Figs. 2-3). Direct  
160 effects of hydraulic diversity on stability were weak: we found a marginally significant positive  
161 effect of functional diversity of stomatal control on stability ( $t=1.92$ ,  $P=0.058$ ) but no significant  
162 relationship with functional diversity of drought tolerance ( $t=1.12$ ,  $P=0.27$ ; Supplementary Fig. 4).  
163 Hydraulic diversity explained a much higher share of variability in asynchrony than it did in  
164 stability (Supplementary Table 2).

165  
166 Structural equation models allowed us to disentangle the direct and indirect drivers and  
167 connections behind observed diversity effects on stability (Fig. 3). Species asynchrony was, as we  
168 predicted, the principal mediator of indirect effects of species richness via hydraulic diversity on  
169 stability. Our model fit the data well (Fishers'  $C=9.7$ , d.f.=8,  $P=0.28$ ,  $n=218$ ). The hypothesized  
170 pathways explained 35% of variation in stability (fixed effects, marginal  $R^2$ ), which increased to  
171 58% if both fixed and random effects (conditional  $R^2$ ) were considered. Species richness,

172 functional diversity of stomatal control and functional diversity of drought tolerance explained  
173 52% of variation in species asynchrony (marginal  $R^2$ ). Species asynchrony was the strongest direct  
174 driver of stability (standardized path coefficient of direct effect 0.76,  $P < 0.001$ ). Tree species  
175 richness increased stability indirectly through increasing species asynchrony (standardized path  
176 coefficient of compound effect 0.35, i.e. the product of the coefficients along the path). Note, that  
177 we did not find an additional independent effect of species richness on stability ( $P = 0.31$ ) once we  
178 had accounted for the pathway via asynchrony. Hence, most of the variation in stability was  
179 explained by species asynchrony. Quantifying hydraulic diversity allowed us to disentangle some  
180 of the functional drivers behind asynchronous species responses: both functional diversity of  
181 stomatal control and functional diversity of drought tolerance contributed to increased stability via  
182 positive effects on species asynchrony (standardized path coefficients of direct effects on  
183 asynchrony 0.18,  $P = 0.005$  and 0.30,  $P < 0.001$ ). Functional diversity of drought tolerance, however,  
184 also had a direct negative effect ( $P = 0.007$ ) on stability that was smaller than its positive effect on  
185 asynchrony (standardized path coefficients of direct effects  $-0.21$  vs 0.30). Importantly, only  
186 functional diversity but not community-weighted means of the hydraulic trait gradients explained  
187 variations in stability (effect of CWM of stomatal control and CWM of drought tolerance on  
188 stability both not significant with  $P \geq 0.25$ ; Fig. 3).

189

190 We further separated the components of our stability measure — the temporal mean ( $\mu_{AWP}$ ) and  
191 the temporal standard deviation ( $\sigma_{AWP}$ ) of productivity — to examine the underlying cause of the  
192 observed biodiversity-stability relationships (Fig. 4). Tree species richness directly increased both  
193 the mean and the standard deviation of productivity similarly (standardized path coefficient of  
194 direct effect 0.23 vs 0.30). Tree species richness thus increased mean productivity but this was



195 accompanied by increased variation in productivity. However, species richness also decreased the  
196 standard deviation of productivity indirectly via its positive effect on species asynchrony with  
197 about the same strength (indirect effect of species richness on  $\sigma_{AWP}$   $-0.3$ , calculated as the product  
198 of the coefficients along each significant path and their sum<sup>43</sup>; Fig. 4). Species asynchrony, which  
199 increased with species richness and hydraulic diversity, hence stabilized productivity through  
200 buffering its temporal variation (standardized path coefficient of direct effect of species  
201 asynchrony on  $\sigma_{AWP}$   $-0.47$ ,  $P < 0.001$ ). The unexpected direct negative effect of functional diversity  
202 of drought tolerance on stability (Fig. 3, see above) can be attributed to its positive effect on the  
203 temporal standard deviation (Fig. 4, marginally significant,  $P = 0.06$ ). Finally, the CWM of drought  
204 tolerance increased both, mean productivity and the standard deviation of productivity  
205 (standardized path coefficients of direct effects  $0.21$  vs  $0.16$ ). That is, communities dominated by  
206 drought-intolerant species (those with higher trait gradient scores; Supplementary Fig. 1) had a  
207 higher productivity but tended to also have a higher variation in productivity. Overall, stability  
208 increased with species richness (Fig. 3) through increased mean productivity (i.e. overyielding)  
209 and buffered temporal variation in productivity (Fig. 4).

210

## 211 **Discussion**

212 Our results provide experimental evidence that the insurance effect<sup>14</sup> of diversity stabilizes tree  
213 productivity in forest ecosystems. We show that the stability of forest community productivity  
214 increases with tree species richness and that asynchronous productivity of co-existing species in  
215 response to climatic variation is the principle mediator of this diversity effect. As hypothesized,  
216 both hydraulic diversity in stomatal control and drought tolerance had net positive but indirect

217 effects on stability that operated via enhanced species asynchrony. In contrast, the community-  
218 weighted means of these hydraulic trait gradients did not influence stability.

219

## 220 **Species asynchrony and stability**

221 The controlled diversity gradient of the BEF-China experiment<sup>42</sup> ranging from monocultures to  
222 mixtures of 24 tree species, detailed trait information and the use of structural equation models<sup>43</sup>  
223 allowed us to disentangle the direct and indirect drivers of stability in forests. We show here that  
224 species richness increases stability indirectly via promoting asynchronous species productivity  
225 over time. Stability and species asynchrony were shown to increase concomitantly with tree  
226 species richness in former studies<sup>6,12,40</sup>, but here we provide experimental evidence to show that  
227 species richness drives species asynchrony and thereby stability in forests. Asynchronous  
228 productivity integrates different mechanisms, such as those captured by the selected hydraulic  
229 traits that help species to cope with variable climatic conditions. The largest contributor to the  
230 stability of productivity was species asynchrony which largely enhanced stability via buffering  
231 (reducing) the variation of productivity over time<sup>6,7,12,14,22</sup>. Species richness also increased  
232 temporal mean productivity directly. This finding is in line with a rapidly increasing number of  
233 studies that support the view that forest productivity increases with increasing tree species  
234 richness<sup>17–19,40</sup>. However, this increased productivity by itself did not increase stability because  
235 species richness also increased the temporal variation of productivity. Stability only increased due  
236 to the variance buffering effect of species asynchrony on productivity (Fig. 4).

237

238 The asynchronous growth dynamics of different species in our experimental tree communities  
239 likely result from different, non-mutually exclusive mechanisms. First, extrinsic factors like

240 climate (the variable with the likely strongest inter-annual change during our study) may increase  
241 species asynchrony. Species react differently to climatic conditions<sup>e.g.28,34</sup> and species asynchrony  
242 is thus likely driven by idiosyncratic growth responses to climatic variability. Next, tree growth in  
243 mixtures is shaped by tree-tree interactions such as resource partitioning and biotic  
244 feedbacks<sup>20,29,30,44</sup> which may in turn be modulated by changes in climatic conditions<sup>45-47</sup>. Finally,  
245 intrinsic rhythms like mast seeding<sup>26,27</sup> may induce asynchronous growth dynamics. These  
246 intrinsic factors are, however, presumably less important for inter-annual changes in species  
247 productivity in young forest stands. We expect that the observed strong species asynchrony  
248 resulted from species' response strategies to climate and how these strategies, which we quantified  
249 via hydraulic traits, shape the nature of tree-tree interactions along climatic stress gradients.

250

### 251 **Hydraulic diversity and stability**

252 We used two orthogonal hydraulic trait gradients (Supplementary Fig. 1), related to species-  
253 specific stomatal control and drought tolerance and explored their relative contribution to stability.  
254 This allowed us to explain some of the mechanisms that induced asynchronous growth dynamics  
255 and stabilized productivity in the face of highly variable climatic conditions. We show that species  
256 asynchrony increased with dissimilarity in hydraulic traits and expect that the relative importance  
257 of these hydraulic traits for tree productivity likely depends on the prevailing climatic conditions.  
258 According to the stress-gradient hypothesis<sup>48</sup> and its contextualisation for forests<sup>49</sup>, traits related  
259 to hydraulic functioning are likely more important for productivity in dry years, when water is the  
260 limiting resource, while their importance should be lower during years with ample water.

261

262 Functional diversity in stomatal control increased species asynchrony and thus indirectly stability  
263 through reducing variation in productivity. This effect of hydraulic diversity on stability is  
264 consistent with recent evidence that tree hydraulic diversity buffers temporal variations in forest  
265 ecosystem carbon fluxes during drought<sup>41</sup>. Functional diversity in stomatal control may promote  
266 species asynchrony among water spenders and water savers. The former keep their stomata open  
267 and continue to transpire during drought. This strategy, however, likely relies on continuous water  
268 uptake via roots to balance transpiration losses and carries high cavitation risks<sup>28,37</sup>, a principle  
269 mechanism behind drought-induced mortality across tree taxa<sup>50</sup>. Conversely, water savers can  
270 reduce this risk but may face carbon starvation under prolonged droughts<sup>28</sup> even though starvation  
271 is less ubiquitous than cavitation<sup>50</sup>. These contrasting stomatal control strategies themselves may  
272 induce strong inter-annual changes in tree growth while also determining the water availability in  
273 mixed-stands through soil water partitioning between co-existing species. In tree neighbourhoods  
274 comprising species with different stomatal control strategies, water spenders may benefit from the  
275 water saving strategy of their neighbours through higher levels of remaining soil water<sup>51</sup>.  
276 Likewise, water savers might recover faster from (short) droughts and could thus profit from  
277 spenders in their neighbourhood that cannot as quickly use improved soil water conditions. Both  
278 may thus profit from neighbourhood species richness as the likelihood for functional dissimilar  
279 species increases with species richness. Diversity in stomatal control is therefore one potential  
280 mechanism that explains reported positive neighbourhood species richness effects on individual  
281 tree growth during drought<sup>40,45</sup>.

282

283 Functional diversity in drought tolerance had a stronger positive influence on stability via species  
284 asynchrony but also a direct (albeit weaker) negative effect on stability. Species asynchrony my

285 result from drought intolerant species facing a higher risk for xylem cavitation or even death under  
286 drought while tolerant species are less affected<sup>28,34</sup>. Drought induced cavitation may lead to a lower  
287 productivity of drought intolerant species through damage or dieback and this effect may last for  
288 years after the drought event as the repair of damaged xylem vessels may require resources at the  
289 expense of productivity<sup>28</sup>. Conversely, drought-intolerant species also have relative advantages, as  
290 positive neighbourhood diversity effects on tree growth during drought were found to be stronger  
291 for drought intolerant species in our study system<sup>45</sup>. Drought-intolerant species are also  
292 characterized by traits associated with an acquisitive resource use strategy<sup>38</sup> (see Supplementary  
293 Fig. 1). This acquisitiveness may enable soil water partitioning between neighbours in favour of  
294 the less drought-tolerant species in the community during drought<sup>45</sup>. At the same time, however,  
295 the likelihood for highly drought-sensitive species to occur within a community increases with  
296 diversity, which in the face of drought may reduce community productivity and therefore also its  
297 stability through damage or dieback of the most vulnerable individuals or species. This may  
298 explain the direct negative effect of drought tolerance diversity on stability that we found in  
299 addition to its positive effect on stability mediated by species asynchrony.

300

301 The direct positive effects of species richness on species asynchrony may result from dissimilarity  
302 in traits<sup>7</sup> that were not considered here; these may include leaf phenology<sup>27</sup>, storage of non-  
303 structural carbohydrates<sup>33</sup>, traits regulating biotic feedbacks<sup>29</sup> and below- and aboveground  
304 structural traits<sup>52-54</sup>. For example, rooting-depth, complementary water uptake through niche  
305 differentiation<sup>55</sup> and facilitation via hydraulic redistribution<sup>51</sup> between species could be important  
306 drivers of species asynchrony and stability belowground. Considering such traits in addition to the

307 hydraulic traits used here may help to decrease the amount of unexplained variance in stability and  
308 species asynchrony.

309

### 310 **Community hydraulic means and stability**

311 In contrast to hydraulic diversity, we did not find effects of community-weighted means of  
312 hydraulic traits on stability. Species asynchrony, the principle driver of stability, depends naturally  
313 more on diverse species strategies (see Fig. 1) than on the prevalence of a specific strategy within  
314 a community. The absence of community mean effects on stability underlines that the observed  
315 responses are not simply related to communities being dominated by particularly stable-growing  
316 species. We found some indication for increased productivity in communities dominated by rather  
317 drought-intolerant (acquisitive) species, consistent with the common expectation for ‘fast’ growth  
318 of these species<sup>35,56</sup>. However, this did not influence stability because the same communities also  
319 had increased variation in productivity, likely because they were susceptible to drought. In contrast  
320 to drought tolerance, stomatal control is not related to the leaf economic spectrum, which may  
321 explain why we did not find an effect of the CWM of stomatal control on stability.

322

### 323 **Outlook**

324 The frequency and severity of droughts and corresponding surges of tree mortality is dramatically  
325 increasing across the globe<sup>31,32</sup>. This situation is expected to worsen with intensifying climate  
326 change<sup>1</sup>, which threatens the climate mitigation potential of the world’s forests<sup>2</sup>. We show that the  
327 stability of forest community productivity increases with tree species richness and that the  
328 principal driver behind this diversity effect are the asynchronous growth dynamics of different tree  
329 species in hydraulically diverse communities. Hence, mixing tree species with a diversity of

330 hydraulic strategies is likely a key management strategy to increase forest stability and their  
331 potential to mitigate the effects of climate change. Hydraulic traits may be used to select suitable  
332 tree species and design mixtures that stabilize productivity in an increasingly variable climate  
333 through diverse response strategies, while excluding those that would succumb to drought or  
334 competition. Here, we examined stability over the first decade since establishment of a large-scale  
335 tree biodiversity experiment. Yet, the biodiversity-stability relationships we report may strengthen  
336 with stand development<sup>25</sup>. Importantly, stability did not compromise productivity. Instead, reduced  
337 temporal variation in productivity coincided with increased productivity in mixed-species tree  
338 communities. Our results extend research on forest stability from comparably species-poor  
339 forests<sup>6,11,12,40</sup> to species-rich subtropical communities with up to 24 co-existing tree species.  
340 Stability increased consistently with tree species richness and did not plateau at low levels of tree  
341 species richness, which underlines the enormous potential of species richness to improve stability  
342 in many of our species-poor or mono-specific secondary and plantation forests around the world.  
343 This finding has important implications; contemporary forestry, and especially large-scale forest  
344 restoration initiatives<sup>3</sup>, like the Bonn Challenge, should focus on hydraulically diverse, mixed-  
345 species stands to enhance stability in a changing climate.

346

## 347 **Methods**

### 348 **Study site and experimental design**

349 In this study, we used data collected from the Tree Biodiversity–Ecosystem Functioning  
350 Experiment China (BEF-China, [www.bef-china.com](http://www.bef-china.com)), located at Xingangshan, Dexing, Jiangxi  
351 (29° 08′–29° 11′N, 117° 90′–117°93′E). BEF-China<sup>17,42</sup> is a large-scale tree biodiversity  
352 experiment that was established at two sites, A and B, each approximately 20 ha in size and planted

353 in 2009 (site A) and 2010 (site B). The study sites are characterized by a subtropical, seasonal  
354 monsoon climate with hot and humid summers and dry and cool winters with a mean annual  
355 temperature of 16.7°C and mean annual precipitation of 1821mm<sup>57</sup>. The sites experienced strong  
356 inter-annual changes in climate-induced water availability during the 11-year observation period  
357 (Supplementary Fig. 9). The diverse native subtropical forests of the area are dominated by  
358 broadleaved mixed evergreen and deciduous tree species, sometimes interspersed with some  
359 conifers<sup>42</sup>. These forests are located in an area of overlap between tropical and temperate zones<sup>58,59</sup>,  
360 which makes them ideally suited to study diverse water use strategies and idiosyncratic species  
361 asynchrony as drivers of biodiversity-stability relationships. Furthermore, the region is densely  
362 populated and experiences frequent anthropogenic disturbances<sup>58</sup>, which makes the maintenance  
363 and improvement of the functioning of these forests important for the global ecosystem balance  
364 and restoration efforts.

365  
366 The experiment covers a richness gradient ranging from 1–24 tree species. Communities have been  
367 assembled from a total pool of 40 native broadleaved evergreen and deciduous tree species (see  
368 Supplementary Table 3 for detailed species information). To ensure the representation of all  
369 species at each diversity level, mixture compositions were randomly allocated following a ‘broken-  
370 stick’ design<sup>42</sup>. In total 226,400 individual trees were planted on 566 plots<sup>42</sup>. In this study, we used  
371 data from six random extinction scenarios allocated to site A and B (three at each site) with a total  
372 of 396 plots and 158,400 planted trees<sup>17</sup>. Of these, we excluded 21 plots prior to our analysis due  
373 to failed establishment success, which left 375 plots (n=218 mixtures and n=157 monocultures)  
374 for our analysis. Each plot had a size of 25.8 × 25.8 m<sup>2</sup> with 400 individual trees planted in 20 ×  
375 20 regular gridded positions (spacing 1.29m between trees). Tree positions and species



376 compositions were randomly assigned to plots. More detailed information about the BEF-China  
377 experiment can be found in Huang *et al.* and Bruelheide *et al.*<sup>17,42</sup>.

378

### 379 **Tree data collection**

380 Individual tree basal diameter at 5 cm above ground level (*gd*), tree height and species identity  
381 were measured annually from 2010 (site A) and 2011 (site B) onwards at the end of the growing  
382 season. To avoid edge effects, the central 12×12 trees were measured for each plot in the 4-, 8-,  
383 16- and 24-species mixtures, while a smaller group of the central 6×6 trees was measured for  
384 monocultures and 2-species mixtures. Missing tree diameter and height values (in total 2% of  
385 census data) were imputed if the increment series was otherwise logical, i.e.  $value_{x+1} \geq$   
386  $value_{x-1}$ . To preserve climate-induced growth changes between years during imputation, we used  
387 a modelled site-specific rate of growth changes for each yearly step (*r*) based on complete  
388 increment series of trees with logical (i.e. with annual increases) and complete census data. A  
389 missing tree value was imputed as:  $(v_{x+1} - v_{x-1}) * r_x + v_{x-1}$ , where *v* is the *gd* or *height*  
390 measurement in a year and *r* the rate of change (see Supplementary Method 1 for details). Overall,  
391 we used annual data of 12,852 planted trees from 2010 to 2019 at site A and of 12,204 trees from  
392 2011 to 2019 at site B to estimate community- and species-level productivity.

393

### 394 **Calculation of aboveground wood production**

395 We used aboveground wood volume production as measure of community and species level  
396 productivity. First, annual aboveground wood volume per tree (awv, m<sup>3</sup>) was calculated with a  
397 fixed form factor of 0.5 (to account for the non-cylindrical shape of trees), which is an average  
398 value for the young subtropical trees in our experiment<sup>20,60</sup>; with

399

$$400 \quad awv = gd * h * f, \quad (1)$$

401

402 where  $gd$  is the basal area at measured tree ground diameter,  $h$  the measured tree height and  $f$  the  
403 form factor. Second, aboveground wood volume production ( $awp$ ,  $m^3 \text{ year}^{-1}$ ) per tree and year was  
404 calculated as

405

$$406 \quad awp = awv_{t+1} - awv_{t-1}, \quad (2)$$

407

408 where  $t$  is an index for the year of measurement. Finally,  $awv$  and  $awp$  of all trees planted as part  
409 of the original design were summed per species and plot and scaled to 1 ha (based on the sampled  
410 subplot areas) to derive annual estimates of aboveground wood volume and volume production  
411 per species ( $AWV_s$ ,  $m^3 \text{ ha}^{-1}$ ;  $AWP_s$ ,  $m^3 \text{ ha}^{-1} \text{ year}^{-1}$ ) and community ( $AWV$ ,  $m^3 \text{ ha}^{-1}$ ;  $AWP$ ,  $m^3 \text{ ha}^{-1}$   
412  $\text{ year}^{-1}$ ), referred to as species and community ‘productivity’. A value of 0 was used in case of  
413 species or plots with no alive tree individuals within individual years (note that completely failed  
414 plots were excluded from the analysis, see above). Our annual productivity estimates thus cover a  
415 complete series of forest growth over the course of 9 and 8 years for site A and B, respectively.

416

### 417 **Stability and asynchrony of production**

418 The temporal stability<sup>16</sup> of tree community productivity, hereafter ‘stability’, was calculated as the  
419 inverse of the coefficient of variation:

420

$$421 \quad \textit{Stability} = \frac{\mu_{AWP}}{\sigma_{AWP}} \quad (3)$$

422

423 where  $\mu_{AWP}$  is the temporal mean and  $\sigma_{AWP}$  the temporal standard deviation of annual plot  
424 productivity for our observation period (2010–2019 for site A and 2011–2019 for site B). Thus,  
425 any diversity effect that leads tooveryielding (a higher productivity of mixtures vs monocultures)  
426 increases stability through increasing temporal mean productivity  $\mu_{AWP}$ . Conversely, any diversity  
427 effect that buffers variations in productivity against changing climatic conditions would increase  
428 stability through decreasing  $\sigma_{AWP}$ <sup>14</sup>. We hypothesize here that asynchronous species growth  
429 dynamics to changing climatic conditions is the dominant mechanism that stabilizes young tree  
430 communities through lowering their productivity variance. To test this we calculated community-  
431 level species asynchrony using the species synchrony statistic  $\phi$ <sup>21</sup> as  $1 - \phi$ :

432

$$433 \text{ Species asynchrony} = 1 - \frac{\sigma_{AWP}^2}{(\sum_{i=1}^n \sigma_{AWP_{s_i}})^2} \quad (4)$$

434

435 where  $\sigma_{AWP_{s_i}}$  is the temporal standard deviation of the annual productivity of species  $i$  in a plot of  
436  $n$  species<sup>6,61</sup>. Thus, species asynchrony increases if the variance in individual species productivity  
437 increases relative to the variance in community productivity. Species asynchrony ranges from 0  
438 (complete synchrony) to 1 (complete asynchrony) and is per definition 0 in monocultures as here  
439 variations in community productivity result from variations within a single species<sup>6</sup>. We expect  
440 here that species asynchrony increases stability through lowering the variation in community level  
441 productivity<sup>6</sup>. Young tree communities, as the ones examined here, show a strongly increasing  
442 productivity over time. As this age trend strongly masks annual variations in productivity, we  
443 removed it and calculated stability as temporal mean productivity divided by its detrended standard  
444 deviation. Similarly, species asynchrony was calculated based on detrended plot and species level

445 productivity. Detrending was performed for each plot and species per plot through regressing  
446 annual productivity against time and then calculating the standard deviation based on the residuals  
447 of this regression following Craven *et al.* and Tilman *et al.*<sup>7,9</sup> (see Supplementary Fig. 10 for a  
448 visualization of this approach).

449

## 450 **Trait gradients**

451 Species employ different strategies to cope with climate induced water variability, which are likely  
452 related to a set of (hydraulic) functional traits (Anderegg *et al.*<sup>41</sup> and citations within). We  
453 assembled species-specific hydraulic trait data related to stomatal control and drought tolerance  
454 that was measured within the experiment (Supplementary Table 1; refs.<sup>38,39</sup>). Trait data were  
455 subjected to a principal component analysis (PCA). The first and second axis partitioned the  
456 hydraulic traits into two orthogonal trait gradients related to stomatal control (PC1) and drought  
457 tolerance (PC2) (Supplementary Fig. 1). Based on physiological and morphological leaf traits, we  
458 classified species as water spenders if they decrease their stomatal conductance only at high levels  
459 of water pressure deficit, and as water savers, if they already decrease stomatal conductance at low  
460 water pressure deficits and have leaves characterized by high stomatal density. We used the water  
461 potential at which 50% of xylem conductivity is lost ( $\Psi_{50}$ ) as key physiological trait to quantify a  
462 species drought tolerance<sup>34</sup>. Higher values of  $\Psi_{50}$  (i.e. lower absolute values  $\Psi_{50}$ ) indicate a higher  
463 susceptibility to drought-induced xylem cavitation. We also included specific leaf area, leaf  
464 toughness and carbon to nitrogen ratio as classic traits of the leaf economics spectrum (LES<sup>35</sup>) in  
465 our analysis, which are associated with a species drought tolerance<sup>38</sup>, to foster the still limited  
466 understanding of trait syndromes that govern forest responses to climatic stress<sup>37</sup>. We used trait  
467 data from 39 out of the 40 planted species (*Castanopsis carlesii* was excluded due to complete

468 establishment failure) and imputed two missing trait values ( $\Psi_{50}$  and stomatal density) for one out  
469 of these 39 species (*Quercus phillyreoides*) with predicted mean value matching with 500 runs  
470 using the R package mice<sup>62</sup>. PCA was performed with the *rda* function in the vegan package  
471 version 2.5-6<sup>63</sup>.

472

### 473 **Quantifying hydraulic diversity and community means**

474 We used the scores of the first and second PCA axis (Supplementary Fig. 1) as measure of the  
475 species stomatal control and drought tolerance strategies within each community. Functional  
476 diversity in traits associated with water spending vs water saving stomatal behaviour (hereafter  
477 ‘functional diversity of stomatal control’) and functional diversity of drought tolerance was  
478 calculated with the ‘FD’ package as abundance-weighted functional dispersion<sup>64,65</sup> using temporal  
479 mean species wood volume per plot as measure of species abundance. Functional dispersion  
480 measures the mean distance of species along each trait gradient<sup>64</sup> and thus represents the  
481 complementarity in hydraulic strategies of co-occurring species within each community. We  
482 calculated community-weighted mean (CWM) trait values for both gradients, hereafter called  
483 ‘CWM of stomatal control’ and ‘CWM of drought tolerance’ using temporal mean species wood  
484 volume per plot as measure of species abundance.

485

### 486 **Modelling framework and statistical analysis**

487 First, we analysed direct relationships between stability, its hypothesized drivers and relationships  
488 between these drivers. Specifically, we used linear mixed-effect models (LMM) to test for  
489 bivariate relationships between species richness, species asynchrony, functional diversity of  
490 stomatal control, functional diversity of drought tolerance, CWM of stomatal control and the

491 CWM of drought tolerance. We also tested the effect of species richness and hydraulic diversity  
492 on species asynchrony. LMM were fit with the nlme package version 3.1-144<sup>66</sup> to allow for the  
493 specification of variance functions with a significance level of  $\alpha=0.05$ . Confidence intervals (95%)  
494 of LMM effects were computed with the ggeffects package<sup>67</sup>. Tree species richness was  $\log_2$   
495 transformed in all models. As the two sites were planted one year apart, we tested for a potential  
496 age effect and other site-specific influences on the biodiversity-stability relationship through  
497 including site and its interaction with species richness as fixed effect. Diversity effects on stability  
498 did not differ between sites ( $P=0.46$  for the interaction). We therefore accounted for site and other  
499 aspects of our experimental design through a nested random effect structure of site, species  
500 composition and arrangement of plots within quadrants (see Huang *et al.*<sup>17</sup>). Model assumptions  
501 were visually checked for independence and homogeneity of variance through examining model  
502 residuals and for normal distribution with quantile-quantile plots. For all response variables we  
503 tested the inclusion of an exponential variance structure<sup>66</sup> to model heteroscedasticity (parsimony  
504 evaluated via AIC) and a log/square-root transformation to normalize residuals. As results did not  
505 differ for any bivariate relationship, we present only the models without variance function or  
506 transformation of response variables.

507

508 Second, we developed a hypothesis driven structural equation model (SEM) framework to  
509 disentangle direct and indirect drivers of stability based on *a priori* knowledge of mechanisms  
510 driving biodiversity-stability relationships (Supplementary Fig. 7). We explored whether the data  
511 supported our first and second hypothesis through including indirect pathways that tested for  
512 effects of the multiple diversity facets species richness, functional diversity of stomatal control  
513 and functional diversity of drought tolerance on stability through effects mediated via species

514 asynchrony. We also included direct pathways from these diversity facets to stability, to test for  
515 mechanisms not mediated by species asynchrony such as performance enhancing effects that  
516 increase temporal mean productivity in mixtures<sup>7,17,40</sup>. To test for the effects of community trait  
517 means we included direct pathways from the CWM of stomatal control and the CWM of drought  
518 tolerance to stability<sup>7,41</sup>. As the experimental manipulation of species richness may directly affect  
519 the functional diversity of a community<sup>42</sup>, we included pathways from species richness to  
520 functional diversity of stomatal control and functional diversity of drought tolerance. Piecewise  
521 SEMs<sup>43</sup> were used to test the support for and relative importance of these hypothesized pathways.  
522 To understand whether diversity effects on stability result from overyielding (increased  $\mu_{AWP}$ ), a  
523 buffered variation (decreased  $\sigma_{AWP}$ ) or both, we fit a separate SEM with these two components of  
524 our temporal stability measure as response. In this second SEM, we tested all hypothesized effects  
525 of diversity on stability for each of its two components (Supplementary Fig. 8).

526  
527 Global model fit was assessed via Fisher's C statistic ( $P > 0.05$ ). We assessed the independence of  
528 variables and included partial, non-directional correlations if these improved model fit based on  
529 tests of directed separations ( $P < 0.05$  for violation of independence claims)<sup>43</sup>. For each SEM we  
530 calculated standardized path coefficients, which allowed us to compare the strength of paths within  
531 and among models and of indirect pathways (calculated as product of the coefficients along the  
532 path)<sup>43</sup>. We fitted individual pathways with LMM using the same random structure and model  
533 evaluation as for our analysis of bivariate relationships detailed above. In all SEMs stability,  
534 species asynchrony, the temporal mean ( $\mu_{AWP}$ ) and the temporal standard deviation of productivity  
535 ( $\sigma_{AWP}$ ) were square-root transformed to best meet model assumptions. Our analysis focuses on the  
536 role of species asynchrony and hydraulic diversity as drivers of biodiversity-stability relationships.

537 As species asynchrony and functional diversity in monocultures are per definition 0, we analysed  
538 their effects within 2-, 4-, 8-, 16- and 24-species mixtures only to avoid many observations without  
539 variation. Alternative models including monocultures yielded the same results for effects reported  
540 here (Supplementary Figs. 6, 11–12). To further test the sensitivity of our models, we ran  
541 alternative SEMs without response transformation but with an exponential variance structure for  
542 log<sub>2</sub> species richness. These yielded the same results (Supplementary Figs. 13–14). SEMs had low  
543 variance inflation (Variance Inflation Factor < 5, a conservative threshold choice<sup>68</sup>). All analyses  
544 were performed in R 3.6.2<sup>69</sup>.

545

#### 546 **Acknowledgements**

547 We thank local workers for their invaluable help in the field. In particular, we acknowledge the  
548 work of Wenzel Kröber on hydraulic trait measurements. This study was supported by the German  
549 Research Foundation (DFG FOR 891), the National Key Research and Development Program of  
550 China (2017YFA0605103) and the Strategic Priority Research Program of the Chinese Academy  
551 of Sciences (XDB31000000). K.E.B. was supported by the German Centre for Integrative  
552 Biodiversity Research (iDiv)’s flexible pool initiative (grant #34600900). H.B. acknowledges the  
553 DFG support for trait measurements (DFG BR 1698/9-2). B.S. was supported by the URPP Global  
554 Change and Biodiversity of the University of Zurich. F.S. was supported by the International  
555 Research Training Group TreeDi funded by the Deutsche Forschungsgemeinschaft (DFG, German  
556 Research Foundation) – 319936945/GRK2324.

557



558 **Author contributions**

559 F.S. and X.L. are co-first authors. H.B., W.H., B.S., Z.T., B.Y., J.B., G.v.O., K.M. and C.W.  
560 designed the project; F.S., X.L., K.E.B., J.A.S., J.B. and C.W. conceived the idea for the  
561 manuscript; X.L., M.K., G.v.O., H.B., F.J.B., A.F., S.L., C.T.P. and F.S. collected and compiled  
562 data; F.S. analysed and interpreted the data and wrote the manuscript with support from X.L.,  
563 K.E.B. and C.W.; F.S. and K.E.B. created figures; All authors discussed the results and contributed  
564 substantially to revisions.

565

566 **Data availability statement**

567 Data supporting the findings of this study have been deposited on the BEF-China project database  
568 (<https://data.botanik.uni-halle.de/bef-china/datasets/634>) and are available upon reasonable  
569 request from the corresponding authors.

570

571

572

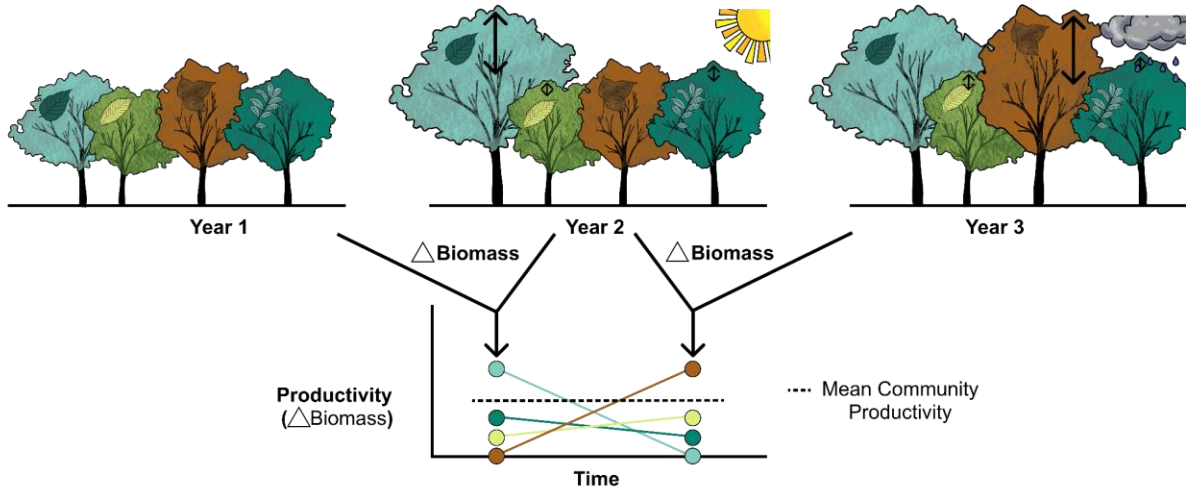

573

574 Fig. 1 Graphical illustration of asynchronous species responses in mixed-species tree communities to  
575 contrasting climatic conditions over a period of three years. The tree community experiences a ‘normal’  
576 (year 1), an exceptionally dry (year 2) and an exceptionally wet (year 3) year, which result in distinctly  
577 different growth responses of the participating species but the same community productivity due to  
578 compensatory dynamics. In our hypothetical example taken from a four species mixture in the BEF-China  
579 experiment, one species (*Nyssa sinensis*, light turquoise) has traits associated with water-spending  
580 behaviour and might grow well during drought, a second species (*Liquidambar formosana*, brown) exhibits  
581 a fast downregulation of stomatal conductance at increasing water pressure deficits and its productivity is  
582 thus more strongly reduced during drought, while the two other species (*Castanea henryi*, *Sapindus*  
583 *mukorossi*) do not show strong reactions to the changing climatic conditions. The reverse response pattern  
584 is found during an exceptionally wet year. We hypothesize here that such asynchronous species dynamics  
585 are the principal drivers behind stabilizing effects of species richness on productivity in mixed-species  
586 forests and that the functional traits of co-existing species — especially those associated with hydraulic  
587 functioning — may help to elucidate the mechanisms that produce this species asynchrony.

588

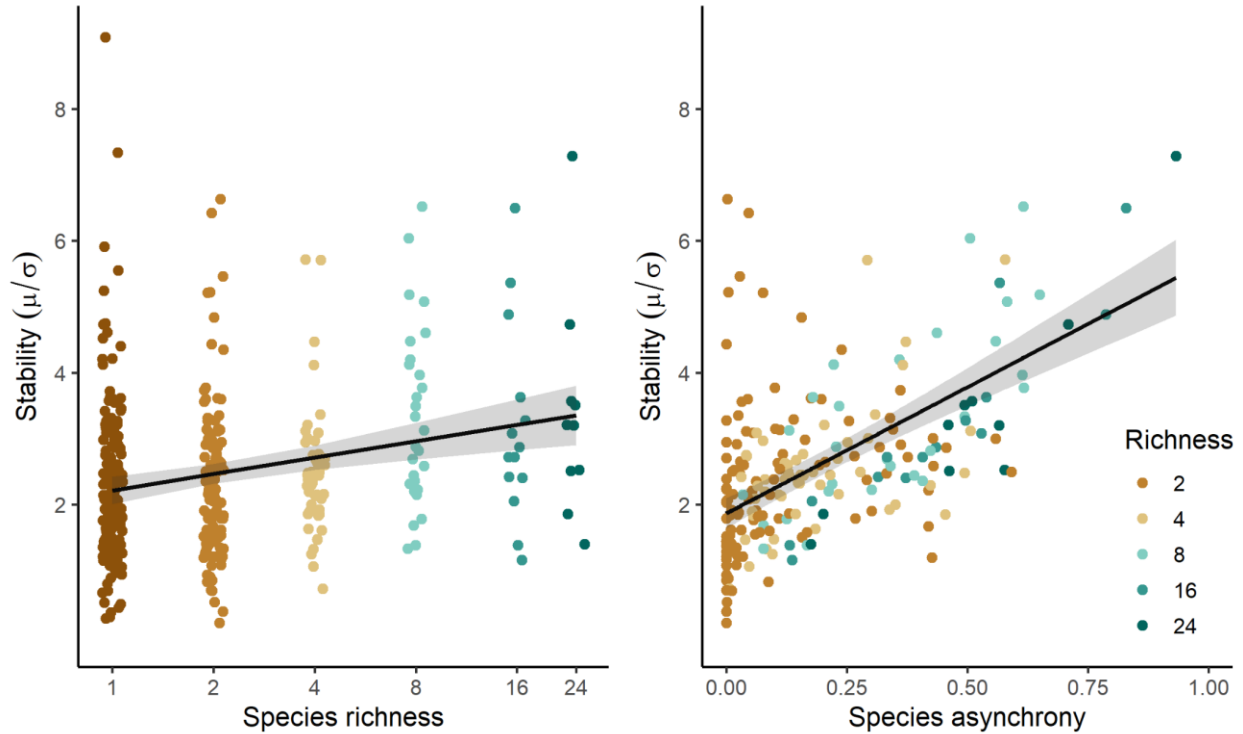

589

590 Fig. 2 Effects of species richness and species asynchrony on stability. Lines are linear mixed-effect model  
591 fits that show (a) significant increases in stability with species richness ( $P < 0.001$ ) along a planted diversity  
592 gradient ranging from monocultures up to mixtures of 24 tree species and (b) significant increases in  
593 stability with species asynchrony ( $P < 0.001$ ) in mixtures. Species asynchrony ranges from 0 to 1, where 0  
594 represents complete synchrony and 1 complete asynchrony. Grey bands represent a 95% confidence  
595 interval. See Supplementary Table 2 for details on the fitted models.

596

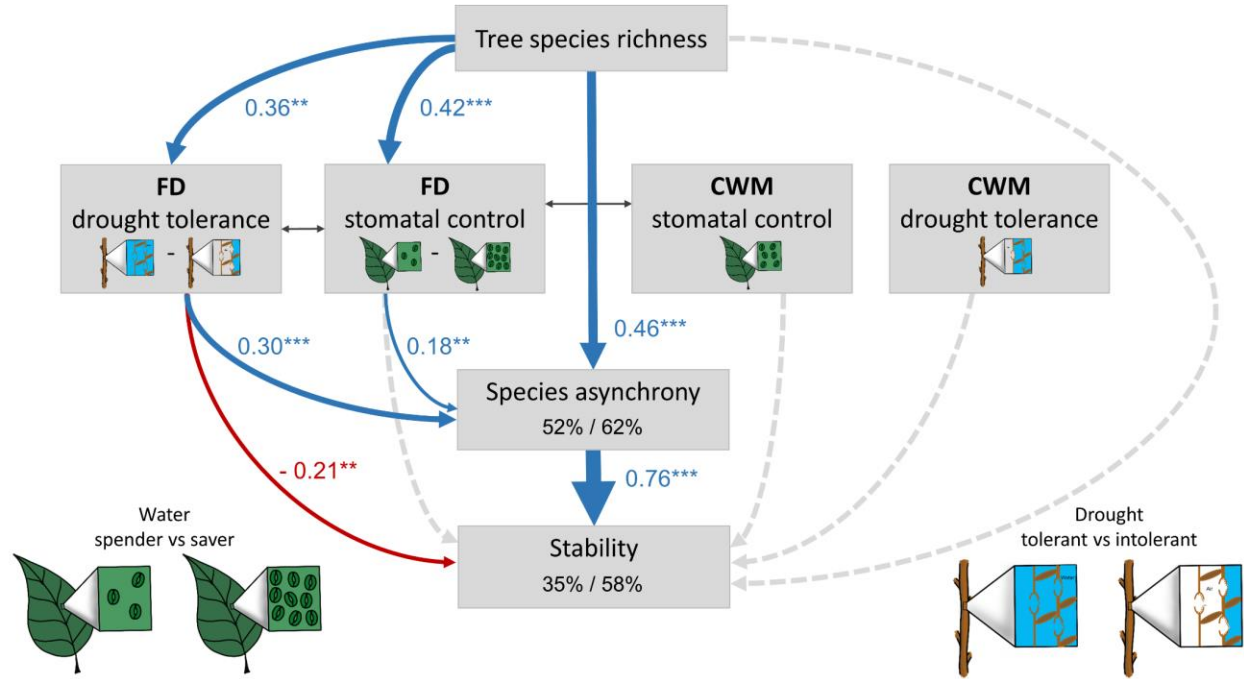

597

598 Fig. 3 Direct and indirect effects of species richness, hydraulic diversity and community hydraulic means

599 on stability. The structural equation model (SEM) tests the direct effects of tree species richness, functional

600 diversity of stomatal control (FD stomatal control) and functional diversity of drought tolerance (FD

601 drought tolerance) as well as their indirect effects mediated via species asynchrony on stability. Effects of

602 community-weighted mean (CWM) traits are explored through testing the effect of the CWM of stomatal

603 control (CWM stomatal control) and the CWM of drought tolerance (CWM drought tolerance) on stability.

604 The sketches schematically illustrate the trait gradients: water-spending vs water-saving stomatal control

605 (few vs abundant stomata) and drought tolerance (high vs low cavitation resistance). Functional diversity

606 was calculated as abundance-weighted functional dispersion. The SEM fit the data well (Fisher's  $C=9.7$ ,  $P$

607  $=0.28$ , d.f.=8,  $n=218$  plots). Data is based on a long, experimental species richness gradient with mixtures

608 of 2, 4, 8, 16 and 24 tree species. Examined variables are shown as boxes and relationships as directional

609 arrows with significant positive effects in blue, significant negative effects in red and non-significant paths

610 in dotted grey based on a hypothesis driven SEM framework (Supplementary Fig. 7). Standardized

611 (significant) path-coefficients are shown next to each path with asterisks indicating significance (\*  $P<0.05$ ,

612 \*\*  $P<0.01$ , \*\*\*  $P<0.001$ ), path-width is scaled by coefficient size. Significant partial correlations<sup>43</sup> are

613 shown through grey, bi-directional arrows. The variation in species asynchrony and stability explained by  
 614 fixed (left, marginal  $R^2$ ) and fixed together with random model effects (right, conditional  $R^2$ ) is shown in  
 615 the corresponding boxes.

616

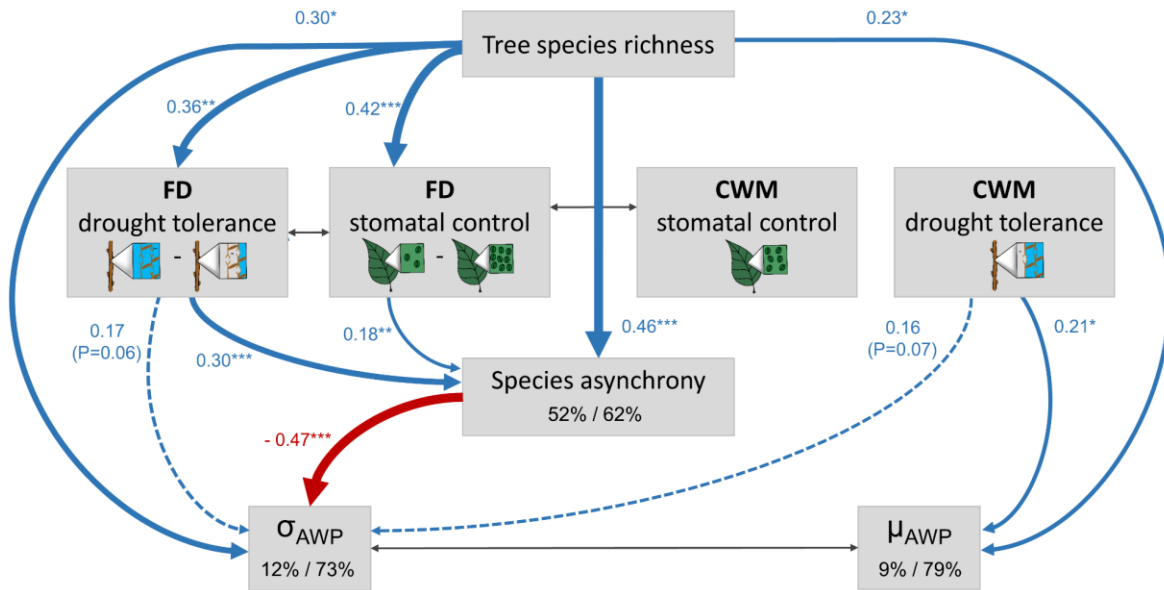

617

618 Fig. 4 Structural equation model (SEM) of direct and indirect effects of species richness, species  
 619 asynchrony, hydraulic diversity and community hydraulic means on the two components of stability, the  
 620 temporal mean ( $\mu_{AWP}$ ) and the temporal standard deviation of productivity ( $\sigma_{AWP}$ ), which represent  
 621 overyielding and variance buffering effects, respectively. Increases in  $\mu_{AWP}$  enhance stability through  
 622 overyielding — a higher productivity in mixtures vs monocultures — and decreases in  $\sigma_{AWP}$  enhance  
 623 stability through buffered variations in productivity. All drivers hypothesized to influence stability, i.e.  
 624 species richness, functional diversity of stomatal control (FD stomatal control), functional diversity of  
 625 drought tolerance (FD drought tolerance), CWM of stomatal control (CWM stomatal control), CWM of  
 626 drought tolerance (CWM drought tolerance) and species asynchrony, were tested for their effects on  $\mu_{AWP}$   
 627 and  $\sigma_{AWP}$ . Only significant pathways ( $P < 0.05$ ) are shown here to avoid overplotting (see Supplementary

628 Fig. 8 for the full model). The sketches schematically illustrate the trait gradients: water-spending vs water-  
629 saving stomatal control (few versus abundant stomata) and drought tolerance (high versus low cavitation  
630 resistance). The SEM fit the data well (Fisher's  $C=9.7$ , global  $P=0.28$ , d.f.=8,  $n=218$  plots). Data is based  
631 on a long, experimental species richness gradient with mixtures of 2, 4, 8, 16 and 24 tree species. Examined  
632 variables are shown as boxes and relationships as directional arrows with significant positive effects in  
633 blue, significant negative effects in red and non-significant paths in dotted grey. Standardized (significant)  
634 path-coefficients are shown next to each path with asterisks indicating significance (\*  $P<0.05$ , \*\*  $P<0.01$ ,  
635 \*\*\*  $P<0.001$ ), path-width is scaled by coefficient size. Significant partial correlations<sup>43</sup> are shown through  
636 grey, bi-directional arrows. The variation in species asynchrony,  $\mu_{AWP}$  and  $\sigma_{AWP}$  explained by fixed (left,  
637 marginal  $R^2$ ) and fixed together with random model effects (right, conditional  $R^2$ ) is shown in the  
638 corresponding boxes.

639

## 640 **References**

- 641 1. IPCC. *Climate change 2014. Impacts, Adaptation, and Vulnerability. Part A: Global and*  
642 *Sectoral Aspects. Contribution of Working Group II to the Fifth Assessment Report of the*  
643 *Intergovernmental Panel on Climate Change* (Cambridge University Press, New York, NY,  
644 2014).
- 645 2. Anderegg, W. R. L. *et al.* Climate-driven risks to the climate mitigation potential of forests.  
646 *Science* **368**; 10.1126/science.aaz7005 (2020).
- 647 3. Griscom, B. W. *et al.* Natural climate solutions. *PNAS* **114**, 11645–11650;  
648 10.1073/pnas.1710465114 (2017).
- 649 4. Bauhus, J. *et al.* in *Mixed-species forests. Ecology and management*, edited by H. Pretzsch, D.  
650 I. Forrester & J. Bauhus (Springer Nature, Berlin, Germany, 2017), pp. 337–382.

- 651 5. Verheyen, K. *et al.* Contributions of a global network of tree diversity experiments to  
652 sustainable forest plantations. *Ambio* **45**, 29–41; 10.1007/s13280-015-0685-1 (2016).
- 653 6. Jucker, T., Bouriaud, O., Avacaritei, D. & Coomes, D. A. Stabilizing effects of diversity on  
654 aboveground wood production in forest ecosystems: linking patterns and processes. *Ecol. Lett.*  
655 **17**, 1560–1569; 10.1111/ele.12382 (2014).
- 656 7. Craven, D. *et al.* Multiple facets of biodiversity drive the diversity–stability relationship. *Nat.*  
657 *Ecol. Evol.* **2**, 1579–1587; 10.1038/s41559-018-0647-7 (2018).
- 658 8. Isbell, F. *et al.* Biodiversity increases the resistance of ecosystem productivity to climate  
659 extremes. *Nature* **526**, 574–577; 10.1038/nature15374 (2015).
- 660 9. Tilman, D., Reich, P. B. & Knops, J. M. H. Biodiversity and ecosystem stability in a decade-  
661 long grassland experiment. *Nature* **441**, 629–632; 10.1038/nature04742 (2006).
- 662 10. Hector, A. *et al.* General stabilizing effects of plant diversity on grassland productivity through  
663 population asynchrony and overyielding. *Ecology* **91**, 2213–2220; 10.1890/09-1162.1 (2010).
- 664 11. del Río, M. *et al.* Species interactions increase the temporal stability of community productivity  
665 in *Pinus sylvestris*–*Fagus sylvatica* mixtures across Europe. *J. Ecol.* **105**, 1032–1043;  
666 10.1111/1365-2745.12727 (2017).
- 667 12. Morin, X., Fahse, L., de Mazancourt, C., Scherer-Lorenzen, M. & Bugmann, H. Temporal  
668 stability in forest productivity increases with tree diversity due to asynchrony in species  
669 dynamics. *Ecol. Lett.* **17**, 1526–1535; 10.1111/ele.12357 (2014).
- 670 13. Scherer-Lorenzen, M. *et al.* in *Forest Diversity and Function. Temperate and Boreal Systems*,  
671 edited by M. Scherer-Lorenzen, C. Körner & E. D. Schulze (Springer, Berlin, Heidelberg,  
672 2005), pp. 347–376.

- 673 14. Yachi, S. & Loreau, M. Biodiversity and ecosystem productivity in a fluctuating environment:  
674 the insurance hypothesis. *PNAS* **96**, 1463–1468; 10.1073/pnas.96.4.1463 (1999).
- 675 15. Hooper, D. U. *et al.* Effects of biodiversity on ecosystem functioning. a consensus of current  
676 knowledge. *Ecol. Monogr.* **75**, 3–35; 10.1890/04-0922 (2005).
- 677 16. Tilman, D. The ecological consequences of changes in biodiversity. a search for general  
678 principles. *Ecology* **80**, 1455–1474 (1999).
- 679 17. Huang, Y. *et al.* Impacts of species richness on productivity in a large-scale subtropical forest  
680 experiment. *Science* **362**, 80–83; 10.1126/science.aat6405 (2018).
- 681 18. van der Plas, F. Biodiversity and ecosystem functioning in naturally assembled communities.  
682 *Biol. Rev.* **94**, 1220–1245; 10.1111/brv.12499 (2019).
- 683 19. Forrester, D. I. & Pretzsch, H. Tamm Review: On the strength of evidence when comparing  
684 ecosystem functions of mixtures with monocultures. *For. Ecol. Manage.* **356**, 41–53;  
685 10.1016/j.foreco.2015.08.016 (2015).
- 686 20. Fichtner, A. *et al.* From competition to facilitation. How tree species respond to neighbourhood  
687 diversity. *Ecol. Lett.* **20**, 892–900; 10.1111/ele.12786 (2017).
- 688 21. Loreau, M. & de Mazancourt, C. Species synchrony and its drivers. Neutral and nonneutral  
689 community dynamics in fluctuating environments. *Am. Nat.* **172**, E48-66; 10.1086/589746  
690 (2008).
- 691 22. Loreau, M. & de Mazancourt, C. Biodiversity and ecosystem stability. A synthesis of  
692 underlying mechanisms. *Ecol. Lett.* **16**, 106–115; 10.1111/ele.12073 (2013).
- 693 23. Valencia, E. *et al.* Synchrony matters more than species richness in plant community stability  
694 at a global scale. *PNAS*; 10.1073/pnas.1920405117 (2020).



- 695 24. Morin, X., Fahse, L., Scherer-Lorenzen, M. & Bugmann, H. Tree species richness promotes  
696 productivity in temperate forests through strong complementarity between species. *Ecol. Lett.*  
697 **14**, 1211–1219; 10.1111/j.1461-0248.2011.01691.x (2011).
- 698 25. Yuan, Z. *et al.* Temporal stability of aboveground biomass is governed by species asynchrony  
699 in temperate forests. *Ecol. Indic.* **107**; 10.1016/j.ecolind.2019.105661 (2019).
- 700 26. Pearse, I. S., Koenig, W. D. & Kelly, D. Mechanisms of mast seeding: resources, weather,  
701 cues, and selection. *New Phytol.* **212**, 546–562; 10.1111/nph.14114 (2016).
- 702 27. Du, Y., Yang, B., Chen, S.-C. & Ma, K. Diverging shifts in spring phenology in response to  
703 biodiversity loss in a subtropical forest. *J. Veg. Sci.* **30**, 1175–1183; 10.1111/jvs.12806 (2019).
- 704 28. McDowell, N. *et al.* Mechanisms of plant survival and mortality during drought: why do some  
705 plants survive while others succumb to drought? *New Phytol.* **178**, 719–739; 10.1111/j.1469-  
706 8137.2008.02436.x (2008).
- 707 29. Barry, K. E. *et al.* The Future of Complementarity: Disentangling Causes from Consequences.  
708 *Trends Ecol. Evol.* **34**, 167–180 (2019).
- 709 30. Grossiord, C. Having the right neighbors: how tree species diversity modulates drought impacts  
710 on forests. *New Phytol.* **228**, 42–49; 10.1111/nph.15667 (2020).
- 711 31. Allen, C. D. *et al.* A global overview of drought and heat-induced tree mortality reveals  
712 emerging climate change risks for forests. *For. Ecol. Manage.* **259**, 660–684;  
713 10.1016/j.foreco.2009.09.001 (2010).
- 714 32. Schuldt, B. *et al.* A first assessment of the impact of the extreme 2018 summer drought on  
715 Central European forests. *Basic Appl. Ecol.* **45**, 86–103; 10.1016/j.baae.2020.04.003 (2020).

- 716 33. O'Brien, M. J., Leuzinger, S., Philipson, C. D., Tay, J. & Hector, A. Drought survival of  
717 tropical tree seedlings enhanced by non-structural carbohydrate levels. *Nature Climate Change*  
718 **4**, 710–714; 10.1038/nclimate2281 (2014).
- 719 34. Choat, B. *et al.* Global convergence in the vulnerability of forests to drought. *Nature* **491**, 752–  
720 755; 10.1038/nature11688 (2012).
- 721 35. Reich, P. B. The world-wide ‘fast-slow’ plant economics spectrum: a traits manifesto. *J. Ecol.*  
722 **102**, 275–301; 10.1111/1365-2745.12211 (2014).
- 723 36. Tardieu, F. & Simonneau, T. Variability among species of stomatal control under fluctuating  
724 soil water status and evaporative demand: modelling isohydric and anisohydric behaviours. *J.*  
725 *Exp. Bot.* **49**, 419–432; 10.1093/jxb/49.Special\_Issue.419 (1998).
- 726 37. Martínez-Vilalta, J. & Garcia-Forner, N. Water potential regulation, stomatal behaviour and  
727 hydraulic transport under drought: deconstructing the iso/anisohydric concept. *Plant Cell*  
728 *Environ.* **40**, 962–976; 10.1111/pce.12846 (2017).
- 729 38. Kröber, W., Zhang, S., Ehmgig, M. & Bruelheide, H. Linking xylem hydraulic conductivity and  
730 vulnerability to the leaf economics spectrum--a cross-species study of 39 evergreen and  
731 deciduous broadleaved subtropical tree species. *PLoS ONE* **9**, e109211;  
732 10.1371/journal.pone.0109211 (2014).
- 733 39. Kröber, W. & Bruelheide, H. Transpiration and stomatal control: a cross-species study of leaf  
734 traits in 39 evergreen and deciduous broadleaved subtropical tree species. *Trees* **28**, 901–914;  
735 10.1007/s00468-014-1004-3 (2014).
- 736 40. Schnabel, F. *et al.* Drivers of productivity and its temporal stability in a tropical tree diversity  
737 experiment. *Global Change Biol.* **25**, 4257–4272; 10.1111/gcb.14792 (2019).

- 738 41. Anderegg, W. R. L. *et al.* Hydraulic diversity of forests regulates ecosystem resilience during  
739 drought. *Nature* **561**, 538–541 (2018).
- 740 42. Bruelheide, H. *et al.* Designing forest biodiversity experiments: general considerations  
741 illustrated by a new large experiment in subtropical China. *Methods Ecol. Evol.* **5**, 74–89;  
742 10.1111/2041-210X.12126 (2014).
- 743 43. Lefcheck, J. S. piecewiseSEM: Piecewise structural equation modelling in r for ecology,  
744 evolution, and systematics. *Methods Ecol. Evol.* **7**, 573–579; 10.1111/2041-210X.12512  
745 (2016).
- 746 44. Trogisch, S. *et al.* The significance of tree-tree interactions for forest ecosystem functioning.  
747 *Basic Appl. Ecol.*, (submitted 30.07.2020, decided for a major revision 09.09.2020, revision  
748 submitted 06.09.2020, BAAE-D-20-00220R1) (2020).
- 749 45. Fichtner, A. *et al.* Neighbourhood diversity mitigates drought impacts on tree growth. *J. Ecol.*  
750 **108**, 865–875; 10.1111/1365-2745.13353 (2020).
- 751 46. Jactel, H., Moreira, X. & Castagneyrol, B. Tree Diversity and Forest Resistance to Insect Pests:  
752 Patterns, Mechanisms and Prospects. *Annu. Rev. Entomol.* **66**; 10.1146/annurev-ento-041720-  
753 075234 (2021).
- 754 47. O'Brien, M. J., Reynolds, G., Ong, R. & Hector, A. Resistance of tropical seedlings to drought  
755 is mediated by neighbourhood diversity. *Nat Ecol Evol* **1**, 1643–1648; 10.1038/s41559-017-  
756 0326-0 (2017).
- 757 48. Bertness, M. D. & Callaway, R. Positive interactions in communities. *Trends Ecol. Evol.* **9**,  
758 191–193; 10.1016/0169-5347(94)90088-4 (1994).
- 759 49. Forrester, D. I. & Bauhus, J. A Review of Processes Behind Diversity—Productivity  
760 Relationships in Forests. *Curr. Forestry Rep.* **2**, 45–61; 10.1007/s40725-016-0031-2 (2016).

- 761 50. Adams, H. D. *et al.* A multi-species synthesis of physiological mechanisms in drought-induced  
762 tree mortality. *Nat. Ecol. Evol.* **1**, 1285–1291; 10.1038/s41559-017-0248-x (2017).
- 763 51. Forrester, D. I. in *Mixed-species forests. Ecology and management*, edited by H. Pretzsch, D.  
764 I. Forrester & J. Bauhus (Springer Nature, Berlin, Germany, 2017), pp. 73–115.
- 765 52. Kunz, M. *et al.* Neighbour species richness and local structural variability modulate  
766 aboveground allocation patterns and crown morphology of individual trees. *Ecol. Lett.* **22**,  
767 2130–2140; 10.1111/ele.13400 (2019).
- 768 53. Guillemot, J. *et al.* Neighbourhood-mediated shifts in tree biomass allocation drive  
769 overyielding in tropical species mixtures. *New Phytol.* **228**, 1256–1268; 10.1111/nph.16722  
770 (2020).
- 771 54. Bu, W. *et al.* Interspecific and intraspecific variation in specific root length drives aboveground  
772 biodiversity effects in young experimental forest stands. *Journal of Plant Ecology* **10**, 158–  
773 169; 10.1093/jpe/rtw096 (2017).
- 774 55. Schwendenmann, L., Pendall, E., Sanchez-Bragado, R., Kunert, N. & Hölscher, D. Tree water  
775 uptake in a tropical plantation varying in tree diversity. Interspecific differences, seasonal shifts  
776 and complementarity. *Ecohydrology* **8**, 1–12; 10.1002/eco.1479 (2015).
- 777 56. Lasky, J. R. *et al.* The relationship between tree biodiversity and biomass dynamics changes  
778 with tropical forest succession. *Ecol. Lett.* **17**, 1158–1167; 10.1111/ele.12322 (2014).
- 779 57. Yang, X. *et al.* Establishment success in a forest biodiversity and ecosystem functioning  
780 experiment in subtropical China (BEF-China). *Eur. J. Forest. Res.* **132**, 593–606;  
781 10.1007/s10342-013-0696-z (2013).

- 782 58. Wang, X.-H., Kent, M. & Fang, X.-F. Evergreen broad-leaved forest in Eastern China: Its  
783 ecology and conservation and the importance of resprouting in forest restoration. *For. Ecol.*  
784 *Manage.* **245**, 76–87; 10.1016/j.foreco.2007.03.043 (2007).
- 785 59. Shi, M.-M., Michalski, S. G., Welk, E., Chen, X.-Y. & Durka, W. Phylogeography of a  
786 widespread Asian subtropical tree: genetic east-west differentiation and climate envelope  
787 modelling suggest multiple glacial refugia. *J. Biogeogr.* **41**, 1710–1720; 10.1111/jbi.12322  
788 (2014).
- 789 60. Fichtner, A. *et al.* Neighbourhood interactions drive overyielding in mixed-species tree  
790 communities. *Nat. Commun.* **9**, 1144; 10.1038/s41467-018-03529-w (2018).
- 791 61. Hautier, Y. *et al.* Eutrophication weakens stabilizing effects of diversity in natural grasslands.  
792 *Nature* **508**, 521–525; 10.1038/nature13014 (2014).
- 793 62. van Buuren, S. & Groothuis-Oudshoorn, K. mice: Multivariate Imputation by Chained  
794 Equations in R. *J. Stat. Softw.* **45**, 1–67 (2011).
- 795 63. Oksanen, J. *et al.* *vegan: Community Ecology Package* (2019).
- 796 64. Laliberté, E. & Legendre, P. A distance-based framework for measuring functional diversity  
797 from multiple traits. *Ecology* **91**, 299–305; 10.1890/08-2244.1 (2010).
- 798 65. Laliberté, E., Legendre, P. & Shipley, B. FD: measuring functional diversity from multiple  
799 traits, and other tools for functional ecology. R package version 1.0-12. (2014).
- 800 66. Pinheiro, J., Bates, D., DebRoy, S., Sarkar, D. & R Core Team. *nlme. Linear and Nonlinear*  
801 *Mixed Effects Models* (2020).
- 802 67. Lüdtke, D. ggeffects: Tidy Data Frames of Marginal Effects from Regression Models. *J.*  
803 *Open Source Softw.* **3**, 772; 10.21105/joss.00772 (2018).

- 804 68. Dormann, C. F. *et al.* Collinearity. A review of methods to deal with it and a simulation study  
805 evaluating their performance. *Ecography* **36**, 27–46; 10.1111/j.1600-0587.2012.07348.x  
806 (2013).
- 807 69. R Core Team. *R: A Language and Environment for Statistical Computing* (Vienna, Austria,  
808 2019).
- 809
